# Supplementary material
Source: Springer Nature journal article supplement (https://www.springermedizin.de/resource/supplementary/12879_2012_2950_MOESM4_ESM.pdf/9445422)

# Recombinant Merozoite Antigens

A

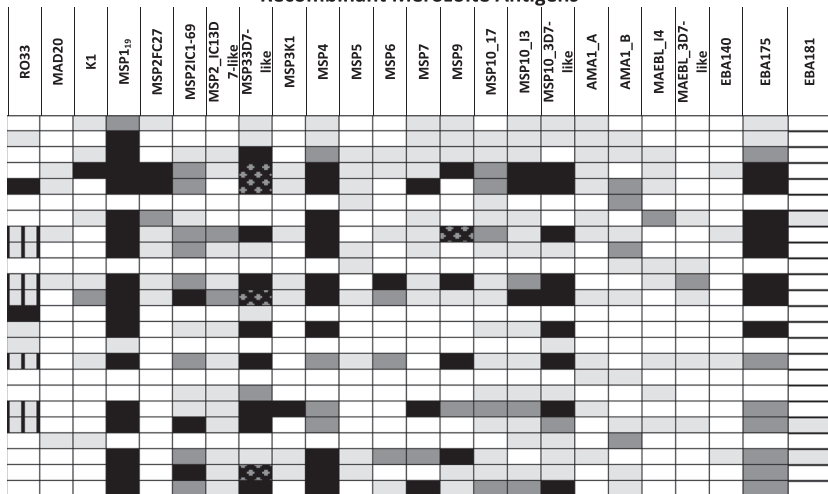

S

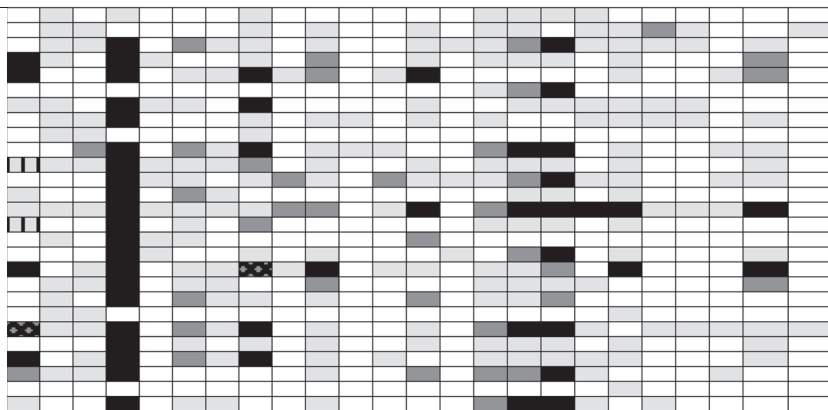

RI

<1

1-4,9

5-9,9

>10

>50

>100

Patterns

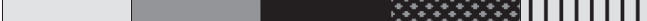

Supplement: MOESM4 [file 9445422]
